# Supplementary material for: Longitudinal analysis to characterize classes and subclasses of antibody responses to recombinant receptor-binding protein (RBD) of SARS-CoV-2 in COVID-19 patients in Thailand
Source: PubMed Central journal article supplement (PMC8354433; doi:10.1371/journal.pone.0255796), 2021-08-10
Supplement: pone.0255796.s005.pdf [file pone.0255796.s005.pdf]

**S1 Table. Data of IgM, IgA and IgG in each COVID-19 patient**

| Patients   | Antibody level |                    |             |                    |             |                    |
|------------|----------------|--------------------|-------------|--------------------|-------------|--------------------|
|            | IgM            |                    | IgA         |                    | IgG         |                    |
|            | Acute serum    | Convalescent serum | Acute serum | Convalescent serum | Acute serum | Convalescent serum |
| <b>P1</b>  | 0.91           | 1.17               | 1.48        | 1.54               | 1.72        | 2.48               |
| <b>P2</b>  | 0.78           | 0.85               | 0.97        | 2.59               | 0.93        | 5.23               |
| <b>P3</b>  | 0.76           | NA                 | 1.00        | NA                 | 1.00        | NA                 |
| <b>P4</b>  | 0.71           | 0.75               | 0.85        | 0.94               | 1.00        | 1.01               |
| <b>P5</b>  | 0.71           | 0.81               | 0.90        | 1.61               | 0.84        | 0.87               |
| <b>P6</b>  | 0.85           | 1.03               | 0.80        | 2.02               | 0.86        | 3.55               |
| <b>P7</b>  | NA             | 0.76               | NA          | 0.98               | NA          | 0.97               |
| <b>P8</b>  | 0.92           | 0.95               | 1.00        | 1.00               | 0.97        | 1.11               |
| <b>P9</b>  | 1.65           | 3.67               | 1.74        | 5.14               | 0.81        | 5.88               |
| <b>P10</b> | 0.72           | 0.75               | 1.00        | 0.99               | 1.00        | 1.01               |
| <b>P11</b> | 0.82           | NA                 | 0.89        | NA                 | 0.95        | NA                 |
| <b>P12</b> | 0.73           | 1.49               | 0.75        | 2.61               | 0.88        | 2.60               |
| <b>P13</b> | 0.72           | 1.13               | 0.88        | 3.81               | 0.83        | 4.12               |
| <b>P14</b> | 0.89           | NA                 | 1.02        | NA                 | 1.05        | NA                 |
| <b>P15</b> | 0.94           | NA                 | 1.98        | NA                 | 1.44        | NA                 |
