# Supplementary material for: Longitudinal analysis to characterize classes and subclasses of antibody responses to recombinant receptor-binding protein (RBD) of SARS-CoV-2 in COVID-19 patients in Thailand
Source: PubMed Central journal article supplement (PMC8354433; doi:10.1371/journal.pone.0255796), 2021-08-10
Supplement: pone.0255796.s006.pdf [file pone.0255796.s006.pdf]

**S2 Table. Characteristics of COVID-19 patients and classes and subclasses of antibody response against RBD of SARS-CoV-2**

| Characteristics              | Antibody       |                |                |                  |                 |                  |                 |
|------------------------------|----------------|----------------|----------------|------------------|-----------------|------------------|-----------------|
|                              | IgM<br>(n = 4) | IgA<br>(n = 8) | IgG<br>(n = 9) | IgG1<br>(n = 12) | IgG2<br>(n = 2) | IgG3<br>(n = 10) | IgG4<br>(n = 4) |
| <b>Age</b>                   | 51.5           | 37.5           | 36             | 33               | 40.5            | 36               | 41.5            |
| <b>(IQR)</b>                 | (38.5 - 62)    | (27.5 - 51.5)  | (27 - 47)      | (27.5-46)        | (36 - 45)       | (27 - 47)        | (33 - 51.5)     |
| <b>P-value</b>               | 0.019          | 0.246          | 0.215          | 0.148            | 0.268           | 0.197            | 0.077           |
| <b>Male (n = 8; (%))</b>     | 3 (75.0)       | 5 (62.5)       | 6 (66.7)       | 7 (58.3)         | 1 (50.0)        | 5 (50.0)         | 2 (50.0)        |
| <b>Female (n = 7; (%))</b>   | 1 (25.0)       | 4 (37.5)       | 3 (33.3)       | 4 (41.7)         | 1 (50.0)        | 5 (50.0)         | 2 (50.0)        |
| <b>P-value</b>               | 0.338          | 0.405          | 0.231          | 0.446            | 0.733           | 0.573            | 0.662           |
| <b>Pneumonia (n = 4 (%))</b> | 4 (100)        | 4 (50.0)       | 4 (44.4)       | 4 (33.3)         | 0 (0)           | 4 (40.0)         | 3 (75.0)        |
| <b>P-value</b>               | 0.001          | 0.051          | 0.092          | 0.363            | 0.524           | 0.154            | 0.033           |
