# Supplementary material for: Longitudinal analysis to characterize classes and subclasses of antibody responses to recombinant receptor-binding protein (RBD) of SARS-CoV-2 in COVID-19 patients in Thailand
Source: PubMed Central journal article supplement (PMC8354433; doi:10.1371/journal.pone.0255796), 2021-08-10
Supplement: pone.0255796.s007.pdf [file pone.0255796.s007.pdf]

**S3 Table. Data of IgG1, IgG2, IgG3 and IgG4 in each COVID-19 patient**

| Patient    | Antibody level |                    |             |                    |             |                    |             |                    |
|------------|----------------|--------------------|-------------|--------------------|-------------|--------------------|-------------|--------------------|
|            | IgG1           |                    | IgG2        |                    | IgG3        |                    | IgG4        |                    |
|            | Acute serum    | Convalescent serum | Acute serum | Convalescent serum | Acute serum | Convalescent serum | Acute serum | Convalescent serum |
| <b>P1</b>  | 1.45           | 1.99               | 0.94        | 0.98               | 1.54        | 2.47               | 1.10        | 1.17               |
| <b>P2</b>  | 1.14           | 1.57               | 1.00        | 1.30               | 1.21        | 31.63              | 0.89        | 0.91               |
| <b>P3</b>  | 0.99           | NA                 | 1.00        | NA                 | 1.04        | NA                 | 1.01        | NA                 |
| <b>P4</b>  | 1.10           | 1.15               | 1.23        | 0.74               | 1.18        | 1.21               | 1.01        | 1.06               |
| <b>P5</b>  | 1.31           | 1.04               | 0.69        | 0.65               | 1.03        | 1.04               | 0.98        | 0.96               |
| <b>P6</b>  | 0.95           | 1.67               | 0.69        | 0.74               | 1.02        | 1.72               | 0.91        | 0.94               |
| <b>P7</b>  | NA             | 0.92               | NA          | 0.77               | NA          | 1.36               | NA          | 0.88               |
| <b>P8</b>  | 1.32           | 1.46               | 1.01        | 0.95               | 1.02        | 1.17               | 0.99        | 1.03               |
| <b>P9</b>  | 1.05           | 5.61               | 0.91        | 1.00               | 0.99        | 2.82               | 0.96        | 1.00               |
| <b>P10</b> | 0.97           | 1.28               | 0.82        | 0.95               | 1.04        | 0.97               | 0.99        | 0.98               |
| <b>P11</b> | 1.03           | NA                 | 0.93        | NA                 | 1.01        | NA                 | 0.99        | NA                 |
| <b>P12</b> | 0.94           | 2.19               | 0.98        | 0.95               | 0.96        | 2.19               | 1.16        | 0.99               |
| <b>P13</b> | 1.00           | 3.84               | 0.46        | 0.45               | 1.01        | 3.95               | 1.08        | 1.03               |
| <b>P14</b> | 1.35           | NA                 | 0.50        | NA                 | 1.27        | NA                 | 1.00        | NA                 |
| <b>P15</b> | 1.26           | NA                 | 0.92        | NA                 | 1.00        | NA                 | 0.99        | NA                 |
